# Supplementary material for: Immobilization of papain on nanoporous silica
Source: Royal Society of Chemistry journal article supplement (doi:10.1039/c3ra47346e), 2014-01-01
Supplement: c3ra47346e1.pdf [file c3ra47346e1.pdf]

Electronic Supplementary Information for  
“Immobilization of papain on nanoporous silica”

Jia He<sup>a</sup>, Ming Wu<sup>b</sup>, Xizeng Feng<sup>b\*</sup>, Xueguang Shao<sup>a</sup>, Wensheng Cai<sup>a\*</sup> □

---

<sup>a</sup> Collaborative Innovation Center of Chemical Science and Engineering (Tianjin), State Key Laboratory of Medicinal Chemical Biology (Nankai University), Research Center for Analytical Sciences, College of Chemistry, Nankai University, Tianjin, 300071, P. R. China. E-mail: wscai@nankai.edu.cn

<sup>b</sup> State Key Laboratory of Medicinal Chemical Biology, College of Life Science, Nankai University, Tianjin, 300071, P. R. China. E-mail: xzfeng@nankai.edu.cn

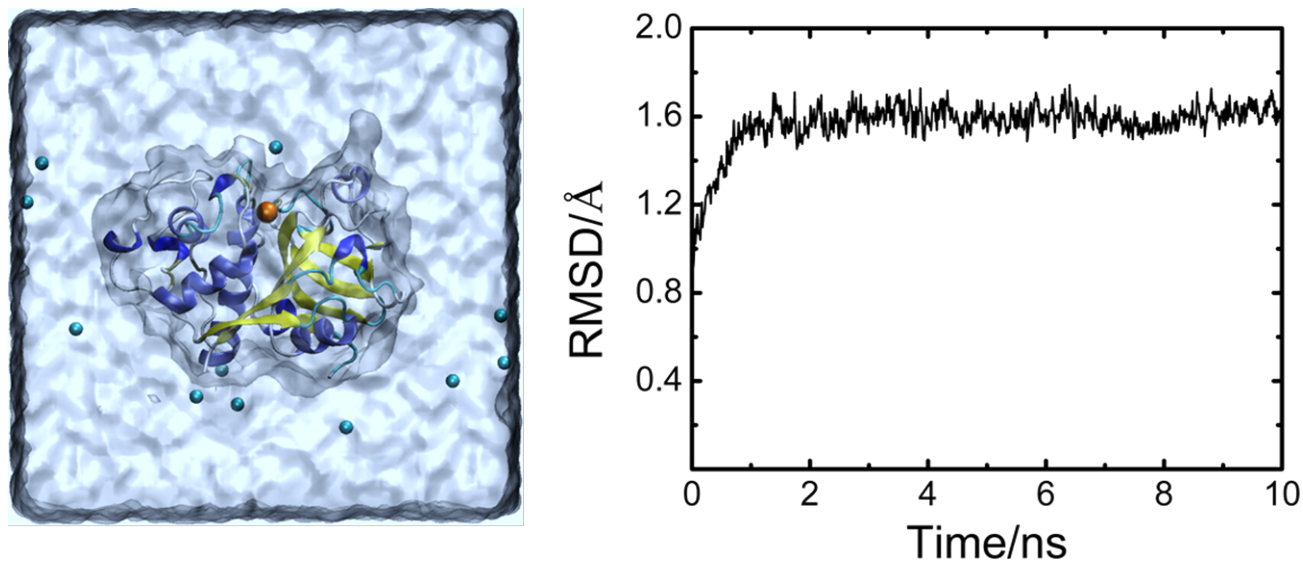

**Figure S1.** Time evolution of the aligned RMSD over the papain with respect to its initial structure.

**Table S1.** Parameters and atomic partial charges of silica used in the simulations.

| Atom Type       | $\sigma$ (Å) | $\epsilon$ (kJ mol <sup>-1</sup> ) | $q$ (e)            |
|-----------------|--------------|------------------------------------|--------------------|
| Si              | 4.4          | 0.6                                | 1.08               |
| O               | 3.54         | 0.1521                             | -0.54              |
| Oh <sup>a</sup> | 3.54         | 0.1521                             | -0.59 <sup>b</sup> |
| H               | 0.449        | 0.046                              | 0.32               |

<sup>a</sup> Silanol O atom.

<sup>b</sup>  $q_{\text{Oh}}$  value from -0.54 to -0.59 e to ensure neutrality

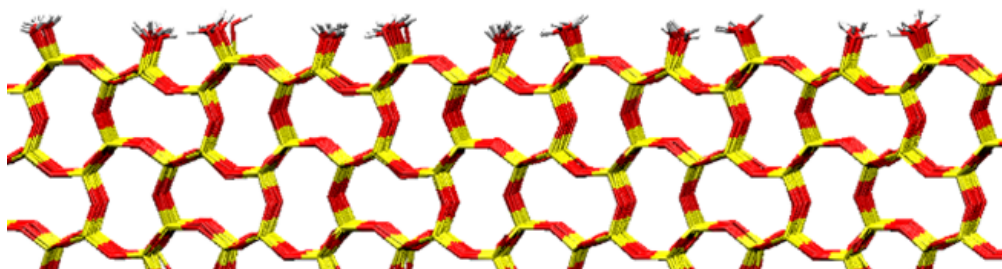

**Figure S2.** Structure of silica surface in the present study. The silica surface was constructed with a surface area of  $103 \text{ Å} \times 103 \text{ Å}$ .

## Top view

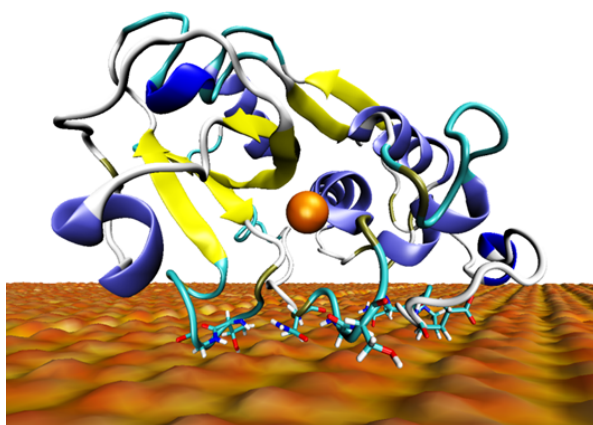

Dock A - ASN18, GLY20, SER21, ASN84, PRO87, GLU89, THR179, GLY180

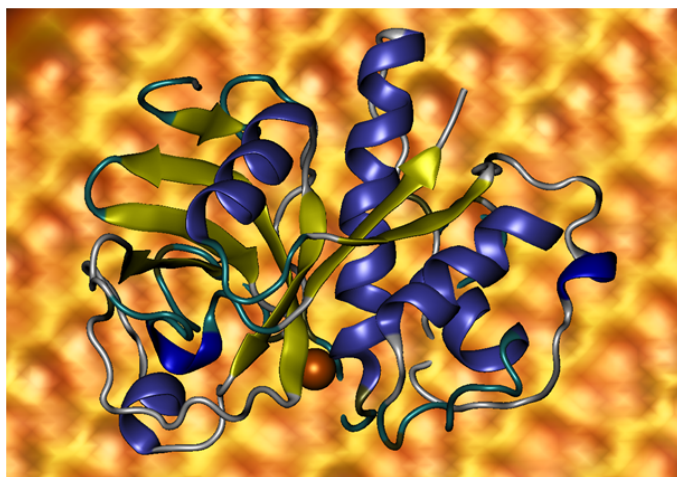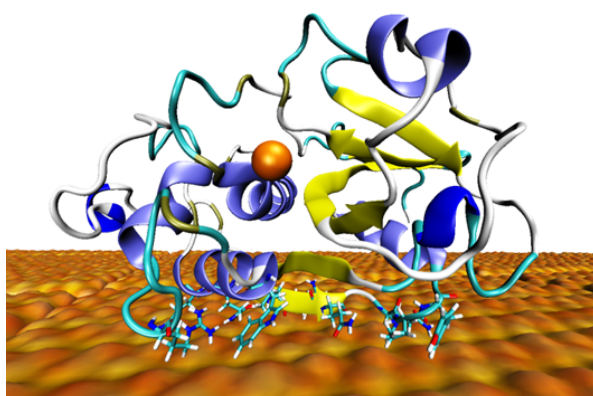

Dock B - ARG59, TRP69, GLN73, GLN77, VAL110, ARG111, GLN112, GLN114, PRO115, TYR116

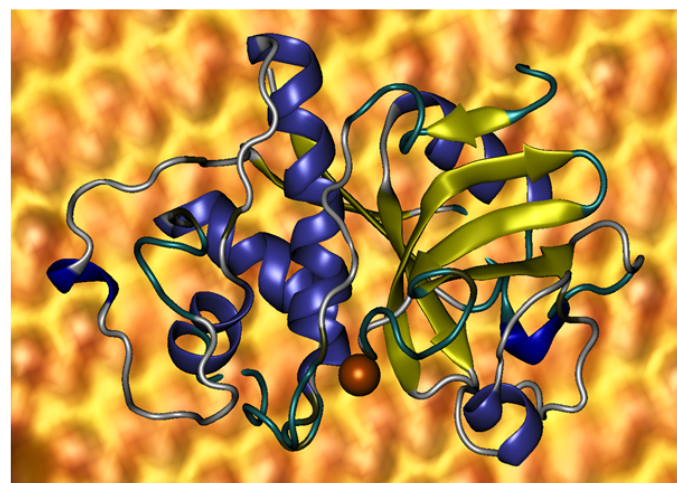

**Figure S3.** Conformations of the top two docked complexes obtained by the PatchDock and FireDock package. The two orientations in Dock A and B were used as representative orientations in adsorption simulations, denoted as Orientation I and II, respectively. The atom S of residue CYS25 in active center is highlighted by orange sphere.

**Table S2.** Detail of systems for MD simulation. The simulations of each orientation were repeated five times.

| Orientation    | Number of Atoms |        |       |     |
|----------------|-----------------|--------|-------|-----|
|                | Papain          | Silica | Water | Ion |
| Orientation I  | 3253            | 10227  | 73842 | 11  |
| Orientation II | 3253            | 10227  | 73854 | 11  |

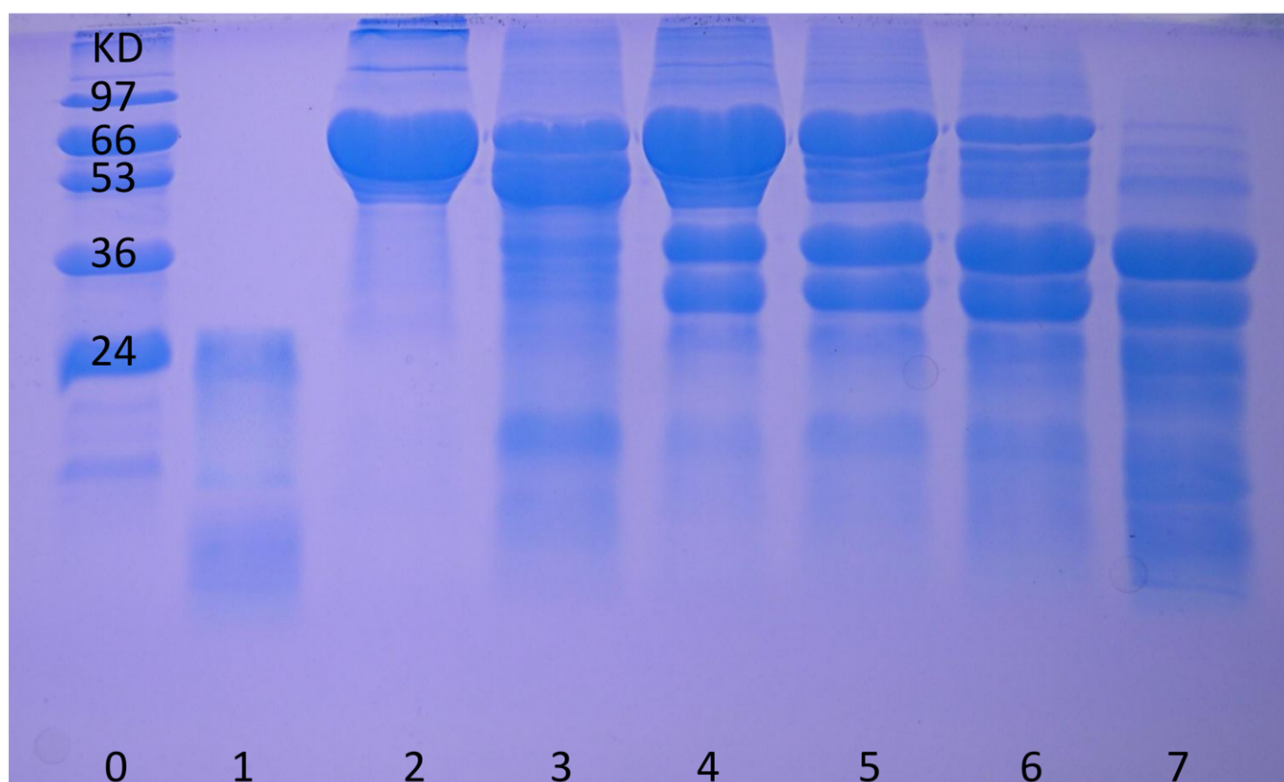

**Figure S4.** The digestive pattern of different concentrations of bovine serum albumin (BSA) digested by papain. The amounts in each wells are as follows: lane 0, protein molecular weight maker; lane 1, 5 mg ml<sup>-1</sup> papain; lane 2, 4 mg ml<sup>-1</sup> BSA; lane 3-7, papain:BSA (w/w) is 1:100, 1:20, 1:10, 1:4, respectively.

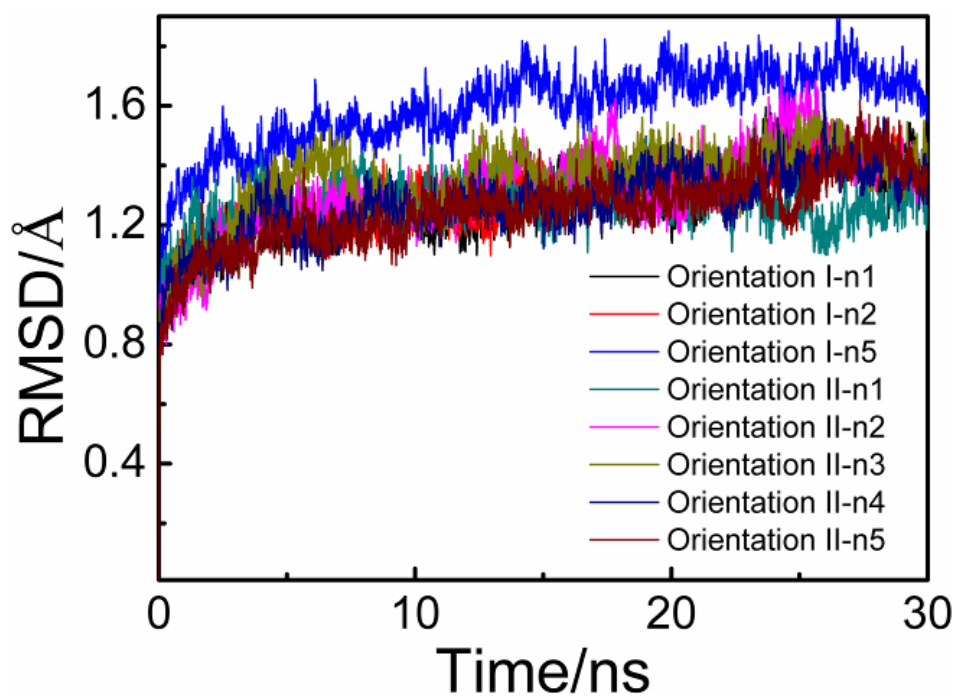

**Figure S5.** Time evolution of the aligned RMSD over the papain with respect to its initial structure for each adsorption system.
